# Supplementary material for: NY-ESO-1 Expression in Meningioma Suggests a Rationale for New Immunotherapeutic Approaches
Source: Oxford University Press journal article supplement (doi:10.1158/2326-6066.cir-13-0029), 2013-08-06
Supplement: 23266066cir130029-sup-tab2.xlsx [file 23266066cir130029-sup-tab2.xlsx]

## Sheet: Sheet1
Supplementary Table 2 - Clinical Variables of Meningioma Cases and Summary of the Immunohistochemistry Results Stratified by Grade.
Sample#	Grade	Age	Gender	Primary/ Recurrent	qPCR	Prior Therapy	IHC Staining
							NY-ESO-1	MAGEA	CD3	CD20	CD8	FOXP3
1	1	52	M	Primary	Y		1	neg
4	1	66	M	Primary	Y		1	neg	1	neg	1	neg
5	1	49	F	Recurrent	Y	NA	1 H	neg	1	neg	1	neg
6	1	46	F	Primary	Y		2	neg	1	neg	1	neg
8	1	63	F	Recurrent	Y	NA	2	neg	2	neg	2	1
11	1	64	F	Primary	Y		3	neg
12	1	84	M	Primary	Y		3	neg
13	1	66	F	Recurrent	Y	NA	3	neg
14	1	62	M	Primary			2
16	1	61	F	Primary			1
17	1	56	M	Primary			3
18	1	41	F	Primary			2
19	1	45	F	Primary			1
20	1	56	M	Primary			1
21	1	25	F	Primary			2
23	1	50	F	Primary			3
24	1	75	M	Primary			2
27	1	67	F	Primary			1
28	1	79	M	Primary			1
29	1	66	F	Primary			1
30	1	28	F	Primary			2
31	1	63	M	Primary			2
33	1	88	F	Primary			1
34	1	48	F	Primary			2
35	1	50	F	Primary			1 H
36	1	67	F	Primary			2
37	1	32	M	Primary			2 H
38	1	45	M	Primary			2
39	1	59	F	Primary			1
40	1	47	F	Primary			1 H
41	1	56	M	Primary			1
42	1	60	M	Recurrent		NA	2
44	1	76	F	Primary			2
45	1	50	F	Primary			1
46	1	52	F	Primary			1
47	1	39	M	Primary			2
48	1	46	F	Primary			0
50	1	79	M	Primary			1
51	1	39	F	Primary			2 H
52	1	44	F	Primary			1
2	2	58	F	Recurrent	Y	Surgery+XRT	2	neg	1	1	1	1
3	2	56	M	Recurrent	Y	Surgery+XRT	3	neg	1	neg	1	1
9	2	82	F	Recurrent	Y	Surgery	2	neg	1	neg	1	1
15	2	63	F	Recurrent	Y	NA	2	neg	1	1	1	neg
22	2	82	M	Recurrent	Y	Surgery+XRT	3 H	neg	2	neg	2	1
25	2	69	F	Primary	Y	Surgery	2 H	neg	1	1	1	neg
26	2	67	M	Recurrent	Y	NA	3 H	neg	1	1	1	neg
43	2	67	M	Recurrent	Y	NA	1 H	neg	1	neg	1	1
49	2	78	F	Primary	Y		0	neg
54	2	48	F	Recurrent		Surgery+XRT	2
55	2	54	M	Recurrent		Surgery+XRT	2		2		1	1
57	2	44	M	Recurrent		Surgery+Chemo	2
58	2	75	M	Recurrent		Surgery	2		1		1	1
59	2	37	F	Primary			2 H
60	2	72	F	Recurrent		Surgery	2
62	2	14	F	Recurrent		Surgery	3
63	2	25	F	Primary			2
64	2	75	M	Recurrent		Surgery	3		1		1	neg
65	2	41	F	Recurrent		Surgery+XRT	1
66	2	73	F	Recurrent		Surgery+XRT	1
67	2	50	F	Recurrent		Surgery+XRT	2
68	2	58	F	Primary			2
69	2	62	F	Recurrent		Surgery	2
70	2	47	F	Primary		Surgery	2
71	2	52	M	Primary			2
72	2	51	F	Recurrent		Surgery+XRT	1
74	2	56	M	Recurrent		Surgery+XRT	3
75	2	52	M	Primary			3		1		1	1
76	2	60	M	Primary			2
78	2	64	F	Recurrent		Surgery+XRT	3		2		2	1
79	2	52	F	Recurrent		Surgery	2
80	2	69	M	Recurrent		Surgery+XRT	1
81	2	65	F	Recurrent		Surgery+XRT	3		1		2	1
82	2	62	F	Recurrent		NA	1
84	2	65	F	Primary			1 H
85	2	76	M	Recurrent		Surgery+XRT, Chemo	2
86	2	54	F	Recurrent		NA	1
88	2	69	F	Recurrent		Surgery+XRT, Chemo	2
90	2	80	M	Recurrent		Surgery	2
91	2	50	F	Recurrent		Surgery	2
92	2	80	M	Recurrent		Surgery	3
94	2	59	M	Recurrent		Surgery	1
96	2	73	M	Recurrent		NA	2
97	2	63	M	Recurrent		Surgery+XRT	3		1		1	1
98	2	47	F	Recurrent		Surgery	3
99	2	25	F	Primary			1 H		2		2	1
100	2	58	F	Primary			3
102	2	69	M	Recurrent		Surgery+XRT	2
103	2	55	M	Recurrent		Surgery+XRT	2 H
104	2	41	M	Primary			3
105	2	78	M	Recurrent		Surgery+XRT, Chemo	3
106	2	52	M	Recurrent		Surgery+XRT	3
108	2	62	M	Primary			1
111	2	67	M	Recurrent		Surgery+XRT	3		1		1	1
113	2	49	M	Primary			2		2		1	1
115	2	84	M	Recurrent		Surgery+XRT	2
116	2	60	M	Recurrent		Surgery	2
7	3	72	M	Primary	Y	NA	1 H	neg	3		3	1
53	3	76	F	Primary	Y	NA	2		1			1
56	3	41	F	Recurrent		Surgery+XRT	1		1		1	neg
61	3	25	F	Primary			1		1		1	neg
73	3	54	M	Recurrent		Surgery+XRT	3	neg	1		1	1
77	3	44	F	Primary			2	neg	1		1	1
83	3	53	M	Recurrent		Surgery+XRT	3	neg	1		1	neg
89	3	55	F	Recurrent		Surgery+XRT	3		2		2	1
93	3	57	F	Recurrent		Surgery+XRT	2	neg	1		2	1
95	3	66	M	Recurrent		Surgery+XRT	2	neg	1		1	1
101	3	41	M	Primary			2		1		2	neg
107	3	50	F	Recurrent		Surgery+XRT, Chemo	2		3		3	1
112	3	61	F	Recurrent		NA	2	neg	2		2	1
* XRT= Radiation; Chemo= Chemotherapy; NA= Not available; Neg= Negative
