# Supplementary material for: NY-ESO-1 Expression in Meningioma Suggests a Rationale for New Immunotherapeutic Approaches
Source: Oxford University Press journal article supplement (doi:10.1158/2326-6066.cir-13-0029), 2013-08-06
Supplement: 23266066cir130029-sup-tab3.xlsx [file 23266066cir130029-sup-tab3.xlsx]

## Sheet: Sheet1
Supplementary Table 3 - Analysis for Reactivity to NY-ESO-1 Protein by ELISA in Meningioma Serum Samples.
#	Sample	WHO Grade	Log conversion titer						Reciprocal titer	NY-ESO-1 IHC staining
			2	2.6	3.2	3.81	4.41	5.01
	Negative control	--	26286	16903	13727.5	11315.5	8507	9133
1	JHH483	3	570996	523534	425175	262220	77186	32481.5	16128.7	2
2	2011-013	2	49627.5	27910	18074.5	12916	11510	9722	4.48758e-07	NA
3	2009-040	1	61864.5	27127.5	16179.5	12201.5	9992	9414	0.000388387	NA
4	2011-025	1	12898	10943	11065.5	11199	9925.5	9524	4.29082e-134	3
5	2010-062	1	14174.5	11554	10747.5	10784	10231	9709	6.22215e-98	NA
6	2010-084	2	12665.5	10454.5	10867	10382	9698	8798.5	2.18124e-124	3
7	2011-036	1	10746.5	10431.5	9289	9534.5	9671	8182	2.71314e-172	3
8	2008-081	1	12245.5	10726.5	9818	9714.5	9681	8982.5	1.93547e-140	NA
9	2010-048	1	9797	9505	9223.5	9050.5	8913.5	8643.5	0	NA
10	2009-043	1	14986.5	12787	11455	10536	NA	NA	2.74817e-60	NA
11	2010-118	1	15562.5	12232	12118	9585.5	NA	NA	1.4166e-45	1
12	2010-008	1	15190	13077.5	12318.5	11008.5	NA	NA	1.2923e-66	1
13	2011-019	1	28434.5	16226.5	12529.5	11069.5	NA	NA	1.18777e-11	2
14	2010-126	1	18700	14458	12453	11263.5	NA	NA	1.273e-33	2
15	2010-009	2	18850	15409	12010.5	10932	NA	NA	5.1956e-31	2
16	2009-005	1	19650.5	13699	11431	9833	NA	NA	7.73355e-25	NA
17	2010-098	1	19144	13388	10991.5	9686	NA	NA	1.46672e-25	1
18	2010-108	1	16015.5	13290	11579	10386	NA	NA	3.16512e-47	NA
19	2011-032	1	18730.5	13575.5	11760.5	10390.5	NA	NA	1.54812e-29	NA
20	2011-039	1	13382.5	11791.5	11038	10273.5	NA	NA	3.83399e-89	NA
21	2008-078	1	20695	14300	11922.5	10129	NA	NA	6.44804e-23	NA
		Cut-off=	170580
		*Minimal dilution factor for which an OD greater than the cutoff can be measured
		NA: not available
